# Supplementary material for: A light-harvesting fluorinated fullerene donor-acceptor ensemble; long-lived charge separation
Source: Royal Society of Chemistry journal article supplement (doi:10.1039/b209724a), 2002-12-19
Supplement: b209724a.doc [file b209724a.doc]

# Supplementary data

**Figure S1.** Fluorescence spectra of **6** (full line) and **1** (dashed line) in dichloromethane with matching absorption (OD665nm = 0.05) at the excitation wavelength.


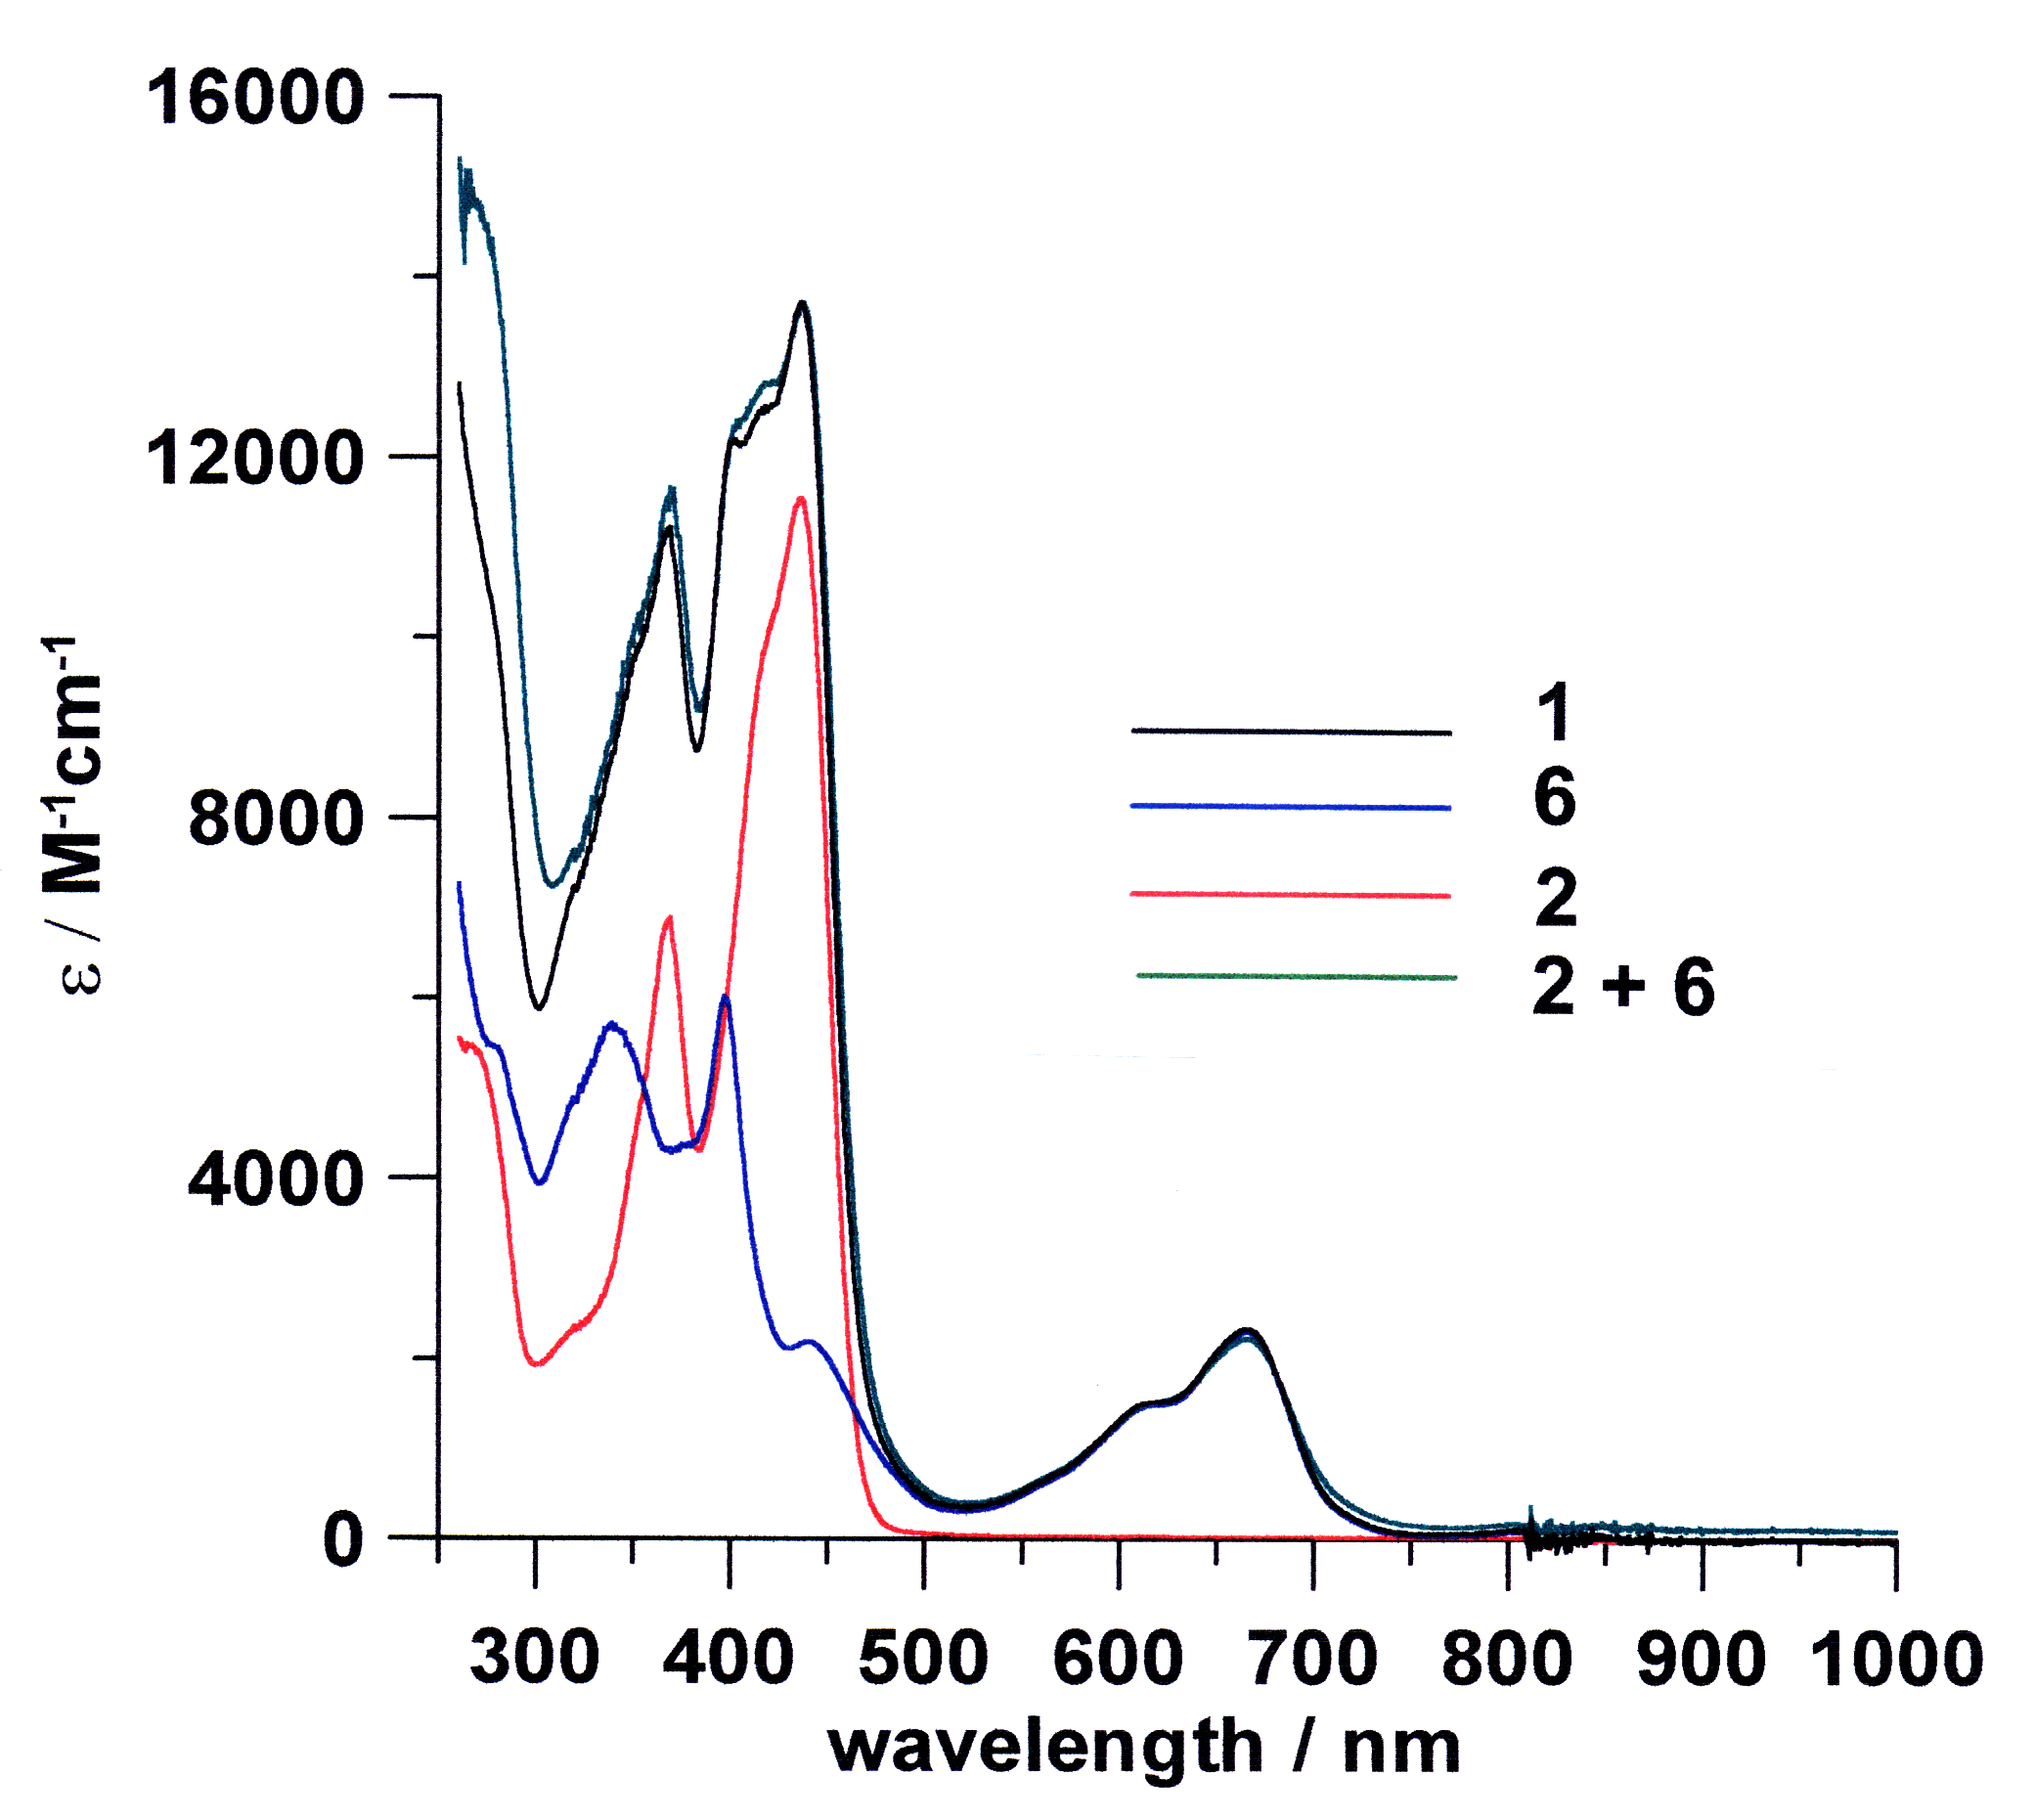


**Figure S2.** UV-visible absorption of compounds **6** (blue),

**2** (red), **1** (black) and the sum of **2** and **6** (green). 337 for

**2** is 2865 M-1.cm-1;337 for **6** is 5652 M-1.cm-1 At 337nm,

**2** absorbs 34 % of light energy whereas **6** absorbs 66 %.
